# Supplementary material for: Distinct roles of DKK1 and DKK2 in tumor angiogenesis
Source: Springer Nature journal article supplement (doi:10.1007/s10456-013-9390-5), 2013-10-03
Supplement: MOESM1 [file 8816148]

# **Distinct roles of DKK1 and DKK2 in tumor angiogenesis**

## ◆ *Angiogenesis*

<sup>1</sup>Hongryeol Park, <sup>1</sup>Hyei Yoon Jung, <sup>1</sup>Hyun-Jung Choi, <sup>1</sup>Dong Young Kim, <sup>2</sup>Ji-Young Yoo,  
<sup>2</sup>Chae-Ok Yun, <sup>3</sup>Jeong-Ki Min, <sup>4</sup>Young-Myoung Kim, and <sup>1</sup>Young-Guen Kwon

Young-Guen Kwon, Ph.D.  
Department of Biochemistry  
College of Life Sciences and Biotechnology  
Yonsei University,  
Seoul, 120-749,  
Republic of Korea.  
e-mail: ygkwon@yonsei.ac.kr  
phone: 82-2-2123-5697  
Fax: 82-2-362-9897

## **SUPPLEMENTAL FIGURE LEGENDS**

### **Supplementary Figure 1. DKK1 decreased and DKK2 increased beta-catenin**

**accumulation. a-b)** Sections of B16F10 melanoma tumors generated in DKK1 Tg, DKK2 Tg, and wild-type mice were stained with anti-beta-catenin and anti-CD31 antibodies. Nuclei were stained with DAPI. Beta-catenin staining is represented (a) and quantified as the ratio of beta-catenin<sup>+</sup>EC/ EC (b, c).

### **Supplementary Figure 2. Retinal hemorrhage was reduced in DKK1 Tg and DKK2 Tg**

**mice in an oxygen-induced retinopathy model. a-b)** DKK1 Tg (n=6), DKK2 Tg (n=6) mice and their wild-type littermates (n=6 in each group) were subjected to hyperoxia in an oxygen-induced retinopathy model. Retinas were observed for hemorrhage (a) that was quantified (b).

### **Supplementary Figure 3. Kremen2 was expressed in overall cells including ECs. B16F10**

tumor section of Wild mouse was stained with anti-Kremen2 and anti-CD31. Nuclei were stained with DAPI.

### **Supplementary Figure 4. DKK1 and DKK2 did not alter VEGF-A expression of B16F10.**

After 4hr starvation, DKK1 (200ng/ml) or DKK2 (200ng/ml) were treated at B16F10 for the indicated times. Protein levels of VEGF-A were detected in whole cell lysates by western blotting.  $\beta$ -actin was used as a protein loading control.

# Supplemental Fig. 1

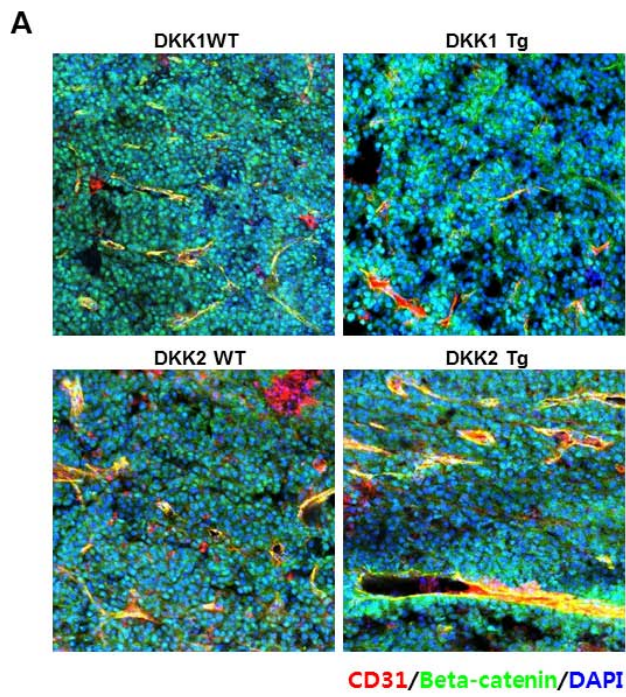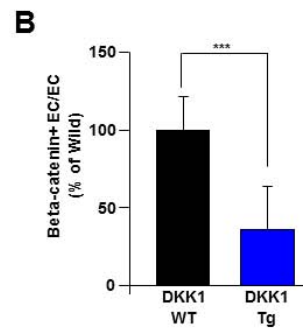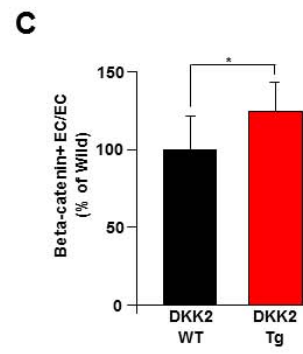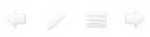

## Supplemental Fig. 2

**A**

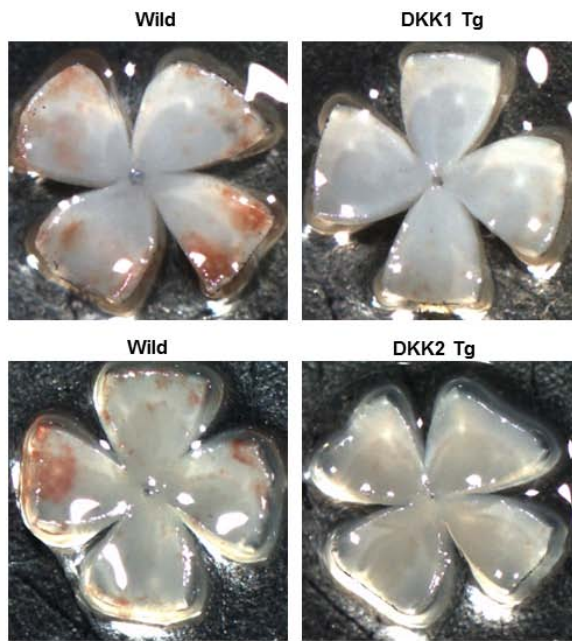

**B**

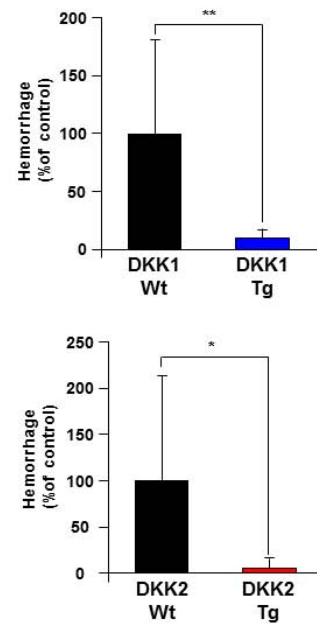

Supplemental Fig. 3

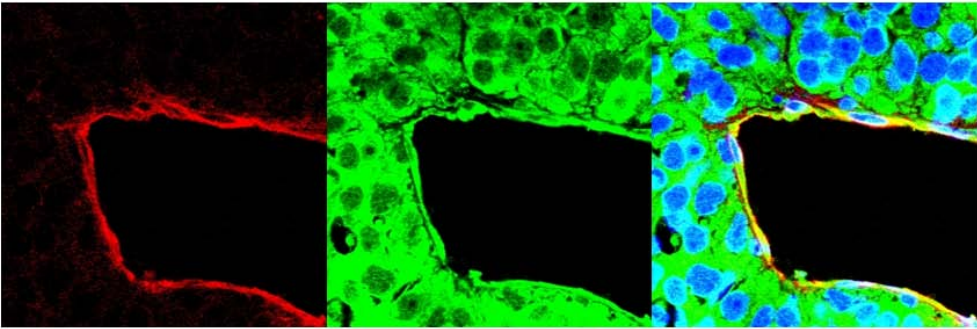

CD31/KREMEN2/DAPI
